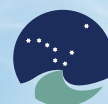

## Original Article

# Escape rate for cod (*Gadus morhua*) from the codend during buffer towing

Jesse Brinkhof<sup>1\*</sup>, Bent Herrmann<sup>1,2</sup>, Roger B. Larsen<sup>1</sup>, and Manu Sistiaga<sup>3</sup>

<sup>1</sup>The Arctic University of Norway UiT, Hansine Hansens veg 18, 9019 Tromsø, Norway

<sup>2</sup>SINTEF Ocean, Fishing Gear Technology, Willemoesvej 2, 9850 Hirtshals, Denmark

<sup>3</sup>SINTEF Ocean, Fishing Gear Technology, Brattørkaia 17C, N-7010 Trondheim, Norway

\*Corresponding author: tel: +47 976 621 67; e-mail: [jesse.brinkhof@uit.no](mailto:jesse.brinkhof@uit.no)

Brinkhof, J., Herrmann, B., Larsen, R. B., and Sistiaga, M. Escape rate for cod (*Gadus morhua*) from the codend during buffer towing. – ICES Journal of Marine Science, 75: 805–813.

Received 30 June 2017; revised 29 September 2017; accepted 4 October 2017; advance access publication 30 October 2017.

The high abundances of Northeast Arctic cod (*Gadus morhua*) in the Barents Sea have led to the development of a new fishing tactic called buffer towing. On factory trawlers, the trawl is deployed immediately after taking the catch onboard, a tactic used to ensure a continuous supply of fish is being processed. If the desired amount of fish is caught before the catch from the previous haul has been fully processed, the trawl is lifted off the seabed and towed at a given depth at low speed. This is called buffer towing. Cod that escape from the codend when the trawl is shallower than the initial fishing depth are exposed to an increased likelihood of barotrauma-related injuries, increased disease susceptibility, and predation, which could be lethal, or affect growth and reproduction capability. Therefore, this study quantified the escape rate and size selectivity during buffer towing of cod. A new analytical method was applied that allows using the same trawl configuration as applied during commercial fishing and avoids potential bias in the assessment of buffer towing size selection. Our results demonstrated a significant size selection for cod during buffer towing where cod measuring up to at least 42 cm in length were proven to escape. In particular, at least 60% of cod measuring 20 cm were estimated to escape during buffer towing. For cod measuring 30 and 40 cm, at least 53 and 45% were estimated to escape during buffer towing, respectively.

**Keywords:** buffer towing, cod, demersal trawl, escape rate, selectivity.

## Introduction

The stock of Northeast Arctic cod (*Gadus morhua* L.) is currently the largest cod stock in the world and it is the most important fishery in the Barents Sea (Yaragina *et al.*, 2011). The annual total allowable catch for cod in 2016 was 894 000 metric tons (ICES, 2016), and the current stock level is anticipated to remain stable in future years (ICES, 2015). On average, about 70% of this stock is caught with bottom trawls. High abundances and dense aggregations of cod frequently lead to large catches (20–30 metric tons) during relatively short towing times (i.e. 15–30 min). Despite these catches, many skippers choose to deploy the trawl directly after taking the catch onboard. The rationale for this practice onboard factory trawlers is to maintain a continuous supply of fish into the processing facilities. The towing time required to refill the trawl is often unpredictable and unknown, and

the approximate required amount of cod is frequently caught before the catch from the previous haul has been processed. Thus, to avoid excessively large catches, the trawl is lifted from the seabed and towed at a given depth (30–70% of maximum depth) at low speed, usually ~1–2 knots, until the factory capacity is restored onboard. We refer to this practice as “buffer towing” but it is known as “shortwiring” in the Alaska pollock trawl fishery (Dietrich and Melvin, 2007; Norwegian Directorate of Fisheries, 2013).

Buffer towing is controversial because of three main reasons. First, buffer towing might reduce the quality of the cod catch due to elevated levels of stress, barotrauma-related injuries and suffocation amongst others. Second, it may lead to mortality of cod (Norwegian Directorate of Fisheries, 2013) and the Norwegian coast guard has documented fish floating on the surface behind

trawlers engaged in buffer towing (Norwegian Directorate of Fisheries, 2013). Third, buffer-towed catches contain fewer undersized fish compared with catches that are taken directly onboard (Norwegian Directorate of Fisheries, 2013), thereby indicative of cod selection by size during buffer towing. Previous studies have documented a significant selection process during haul-back and at the surface for both demersal trawls (Madsen *et al.*, 2008; Grimaldo *et al.*, 2009; Herrmann *et al.*, 2013), and demersal seines (Isaksen and Løkkeborg, 1993). Therefore, it is reasonable to expect that the same would occur during buffer towing.

The quantity and survivability of fish that escape from the codend during buffer towing are not known. Several studies have documented negligible immediate mortality among cod escaping from demersal trawls at the seabed (Soldal *et al.*, 1993; Suuronen *et al.*, 1996; Ingólfsson *et al.*, 2007), but to the best of our knowledge, no studies have investigated the survivability of fish escaping during haul-back, buffer towing, or at the surface (Madsen *et al.*, 2008). Many factors are known to affect the survivability of fish escaping from trawls, including biotic and abiotic factors, e.g. stress increasing the risk of predation or susceptibility to disease, behavioural impairment, scale damage with possible subsequent osmotic disturbances or infections, barotrauma, or other types of injuries inflicted upon fish during the catch or escape processes (DeAlteris and Reifsteck, 1993; Soldal *et al.*, 1993; Chopin and Arimoto, 1995; Suuronen *et al.*, 1996, 2005; Davis, 2002; Ryer, 2002; Ryer *et al.*, 2004; Humborstad and Mangor-Jensen, 2013; Rankin *et al.*, 2017). Therefore, if fish that escapes do not survive, stock health may be compromised and fishing mortality (F) underestimated due to unaccounted mortality of escaped cod. Moreover, the fish that escape during buffer towing measuring more than the minimum landing size (currently 44 cm for cod north of 62°N) represent a loss of marketable catch.

The main objective of this study was to determine whether a selective process occurs during buffer towing. In particular, we addressed the following research questions.

- (i) Does size selection occur during buffer towing?
- (ii) If size selectivity does occur during buffer towing, then what are the sizes of the cod that escape and what is their escape rate?

## Material and methods

### Sea trials and trawl rigging

Experimental fishing was conducted onboard the research trawler R/V “Helmer Hanssen” (63.8 m and 4080 HP) during November 10–29 2016, in the central area of the Barents Sea (N74°59′–N75°26′; E30°54′–E31°17′). The trawl employed was a two-panel Alfredo 3 trawl built entirely of 150-mm polyethylene meshes. The trawl configuration was comparable to the configuration used in the commercial fishery. We used Injector Scorpion otter boards (each weighing 3100 kg and measuring 8 m<sup>2</sup>), which were equipped with 3-m-long backstraps and linked to the sweeps with a 7-m chain. The sweeps measured 60 m in length and they were equipped with a Ø 53-cm steel bobbin at the centre to protect the sweeps from excessive abrasion. The ground gear was 46.9 m in length and comprised a 18.9-m-long rockhopper gear with Ø 53-cm discs in the centre, and a 14-m chain (Ø 19 mm) on each side equipped with three steel bobbins (Ø 53 cm). A sorting grid made of stainless steel was inserted between the codend and the

trawl belly. To reduce catches of cod below the minimum landing size of 44 cm, a grid with a minimum bar spacing of 55 mm is compulsory for the demersal trawl fishery in the Northeast Atlantic. The four-panel codend [mesh size  $132.1 \pm 2.6$  mm (mean  $\pm$  SD)] was mounted to the grid section, where it was preceded by a transition section from two to four panels. Since the mesh size, and codend configuration is regulated by law, this codend is representative for the entire trawl fleet in the Barents Sea. To control the catch size and standardize tow duration, we inserted an excessive fish excluder device, i.e. a release mechanism in the anterior part of the codend (Grimaldo *et al.*, 2014). The excessive fish excluder device consists of a fish lock with escape opening(s) in front. The fish lock was built of netting with 80-mm mesh size, and oblique cut from 152 meshes in circumference in the anterior part down to 72 meshes in the aft part. The anterior part was sewn into the codend 20 meshes in front of the codline, which was equivalent to  $\sim 2$  metric tons of catch. We made a hole in both side panels of the codend in front of the fish lock to release all the excessive fish caught after the codend is filled up to the fish lock. The trawl was monitored using the following sensors obtained from Scanmar: sensors for measuring the door spread, trawl height, and a trawl eye for measuring the towing depth during buffer towing in the water column.

### Experimental method

We were only interested in detecting possible size selection during buffer towing, so a covered codend setup was not convenient because it would have collected fish escaping during regular towing on the seabed. Furthermore, there would have been a possibility of escaping fish re-entering the codend from the cover when using a covered codend at a relative low speed. A cover might also potentially affect the behaviour of the codend during buffer towing, thereby influencing the probability of fish escaping during this process. Therefore, in addition to the technical challenge of using a direct sampling method with a cover for collecting the fish that escaped during buffer towing (Madsen and Holst, 2002), it is possible that this method could lead to biased estimates. Employing a multi-sampler, a system that is acoustically triggered to open and close covers on a trawl, could only partly solve these issues (Madsen *et al.*, 2008; Grimaldo *et al.*, 2009). Therefore, we used an indirect method to assess the fish escape rate during buffer towing. In particular, employing the same trawl, we alternated and compared the hauls with a normal haul-back where the catch was taken directly onboard and hauls where the trawl was lifted off the seabed and buffer towed (Figure 1). The cod lengths (total length) of the entire catch in each haul were measured to the nearest lower centimetre. By comparing the catches from the hauls with and without buffer towing, we indirectly quantified the escape probability for fish during buffer towing using a model developed specifically for this purpose. The towing time on the seabed for hauls with the regular haul-back procedure was limited to 2 h. Hauls with buffer towing lasted for 3 h, where the trawl was towed at the seabed for 2 h. Buffer towing was conducted by lifting the trawl to a depth  $\sim 40\%$  of the towing depth. Since the depth where buffer towing is conducted by factory trawlers varies, this depth was chosen as an average depth reduction, based on personal experience with trials onboard commercial trawlers. This depth-ratio is believed to be the most commonly employed depth for buffer towing in commercial operations, i.e. sufficiently shallow to avoid continuous fishing but deep enough to prevent the swim bladders from bursting.

### Model for assessing size selection during buffer towing

The size selectivity process during trawling can be regarded as a sequential process so the total selectivity  $r_{\text{normal}}(l)$  without buffer towing is:

$$r_{\text{normal}}(l) = r_t(l) \times r_f(l), \quad (1)$$

whereas with buffer towing, the total size selectivity  $r_{\text{extended}}(l)$  is:

$$r_{\text{extended}}(l) = r_t(l) \times r_b(l) \times r_f(l), \quad (2)$$

where  $r_t(l)$  is the size selection during towing at the fishing depth and the haul-back up to the depth where buffer towing begins,  $r_f(l)$  is the size selectivity from the depth of buffer towing to the surface as well as the selectivity at the surface, and  $r_b(l)$  is the size selectivity during buffer towing.

Let  $nm_{li}$  and  $ne_{lj}$  be the numbers of fish in length class  $l$  caught in the normal haul  $i$  and the buffer-towed haul  $j$ , respectively. Based on the group of  $a$  normal hauls and the group of  $b$  buffer-towed hauls, we can calculate the experimental average catch comparison rate  $CC_l$  (Herrmann *et al.*, 2017) as follows.

$$CC_l = \frac{\sum_{j=1}^b ne_{lj}}{\sum_{j=1}^b ne_{lj} + \sum_{i=1}^a nm_{li}} \quad (3)$$

The next step is to express the relationship between the catch comparison rate  $CC(l)$  and the buffer towing size selection process  $r_b(l)$ . Let us assume that the total amount of fish  $n_l$  in length class  $l$  enter the codend of the trawl during one of the normal hauls or buffer-towed hauls (Figure 1).

split parameter (SP) is the proportion of fish entering the codend in the  $a$  normal hauls compared with the in  $a$  normal hauls and the  $b$  hauls with buffer towing which is assumed to be

length independent. Therefore, the expected values for  $\sum_{i=1}^a nm_{li}$  and  $\sum_{j=1}^b ne_{lj}$ , respectively, are:

$$\begin{aligned} \sum_{i=1}^a nm_{li} &= n_l \times SP \times r_{\text{normal}}(l) \\ \sum_{j=1}^b ne_{lj} &= n_l \times (1 - SP) \times r_{\text{extended}}(l) \end{aligned} \quad (4)$$

Based on models (1) to (4) and Figure 1, the theoretical catch comparison rate  $CC(l)$  becomes:

$$\begin{aligned} CC(l) &= \frac{n_l \times SP \times r_t(l) \times r_b(l) \times r_f(l)}{n_l \times SP \times r_t(l) \times r_b(l) \times r_f(l) + n_l \times (1 - SP) \times r_t(l) \times r_f(l)} \\ &= \frac{SP \times r_b(l)}{SP \times r_b(l) + 1 - SP} \end{aligned} \quad (5)$$

After rearranging Equation (5), we obtain the following.

$$r_b(l) = \frac{1 - SP}{SP \times (1 - CC(l))} \quad (6)$$

Thus, we have obtained a direct relationship between the buffer towing selectivity and the catch comparison rate, and in principle, we can assess the buffer towing selectivity based on the catch comparison data.

We estimated the average buffer towing size selectivity using maximum likelihood methods by minimizing the following equation with respect to the parameters describing  $CC(l)$ , which in addition to  $SP$ , includes the parameters in the model that we apply to  $r_b(l)$ .

$$-\sum_l \left\{ \sum_j^b \{ ne_{lj} \times \ln(CC(l)) \} + \sum_i^a \{ nm_{li} \times \ln(1 - CC(l)) \} \right\} \quad (7)$$

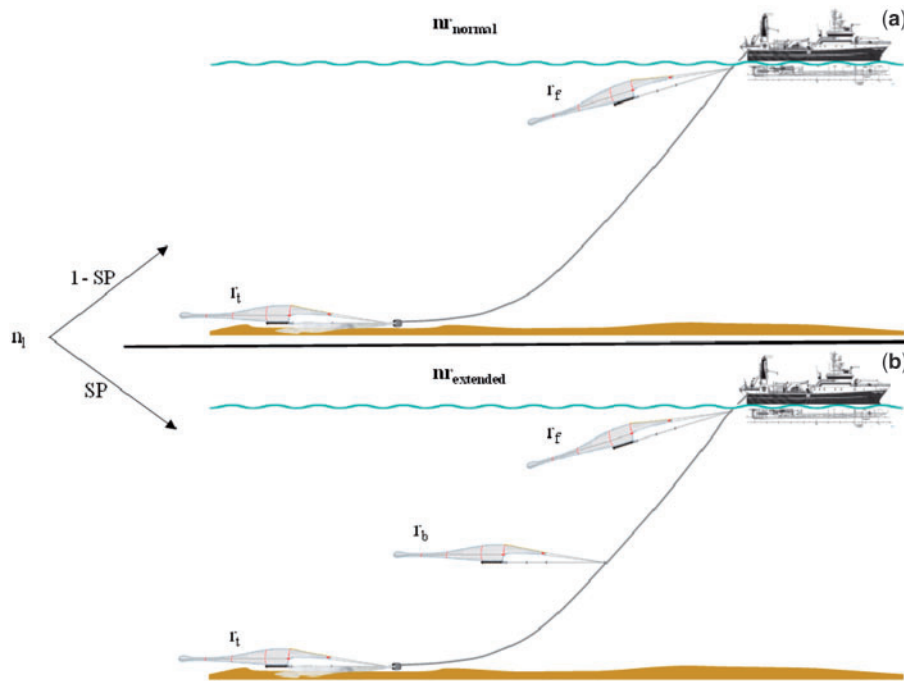

**Figure 1.** Hauling schematic where  $nr_{\text{normal}}$  represents a regular direct haul-back (a) and  $nr_{\text{extended}}$  represents buffer towing (b).

Traditionally, size selectivity for diamond mesh codends was described using a traditional logit size selectivity model (Wileman *et al.*, 1996):

$$r_{\text{logit}}(l, l_{50}, SR) = \frac{\exp\left(\frac{\ln(9)}{SR} \times (l - l_{50})\right)}{1 + \exp\left(\frac{\ln(9)}{SR} \times (l - l_{50})\right)}, \quad (8)$$

where  $L50$  is the length of fish with a 50% probability of being retained during the selection process and  $SR$  is  $L75-L25$ . Thus, we adapt model (8) as a starting point. However, we also consider the potential situation where only a fraction of the fish in the codend are capable of attempting to escape during buffer towing, which is obtained by considering the assumed length-independent contact parameter  $C$  (Herrmann *et al.*, 2013), as follows.

$$\begin{aligned} r_{\text{Clogit}}(l, C, l_{50}, SR) &= 1 - C + C \times r_{\text{logit}}(l, l_{50}, SR) \\ &= 1 - \frac{C}{1 + \exp\left(\frac{\ln(9)}{SR} \times (l_{50} - l)\right)} \end{aligned} \quad (9)$$

However, without assuming any specific model for the buffer towing selectivity, such as Equations (8) or (9), we could formally determine whether there is evidence for size selectivity due to buffer towing by analysing the catch comparison data. The null hypothesis was that no escapes occurred during buffer towing, which implies that  $r_b(l) = 1.0$  for all  $l$ , and thus based on Equation (5),  $CC(l) = SP$ . Therefore, we first tested whether this hypothesis could be rejected based on the collected data by estimating the value of  $SP$  under this hypothesis (Equation 7), and then calculating the  $p$ -value to obtain at least as big discrepancy as observed between the experimental catch comparison data and the model by chance. If this  $p$ -value was below 0.05, we then rejected the null hypothesis unless the data appeared to exhibit over-dispersion by inspecting if there is any fish length dependence pattern in the deviation between the modelled catch comparison rate and the experimental data points. If the null hypothesis was rejected, thereby providing evidence for buffer towing size selectivity, then we quantified this selectivity with models (8), (9), and (5). This process included testing whether using models (8) and (9) in (5) could describe the observed catch comparison data sufficiently well ( $p$ -value > 0.05), where we employed these models to estimate the parameters with equation (7). The parameters  $SP$ ,  $L50$ , and  $SR$  were estimated with equation (8), and the estimation in equation (9) included the additional parameter  $C$ . If both equations (8) and (9) could describe the experimental data, then that with the lowest Akaike's information criterion (AIC) value (Akaike, 1974) was selected for modelling the buffer towing size selectivity. Also, both models are structural models, and are thus robust for extrapolations outside the range of the length classes that were measured (Santos *et al.*, 2016). We estimated 95% CIs for the catch comparison curve and the resulting buffer towing size selection curve using double bootstrapping for unpaired catch comparison data (Sistiaga *et al.*, 2016). We performed 1000 bootstrap replicates.

All estimates were obtained using the software tool SELNET, which was developed for estimating the size selectivity and catch comparisons for fishing gears (Herrmann *et al.*, 2013). The estimations were then exported and graphically represented using R Core Team (2013).

## Fall-through

Fall-through experiments were performed to assess the potential size selectivity in the codend. The length of each sample fish was measured and tested in a vertical direction under the influence of gravity to determine whether it would fall through the meshes or not (see Herrmann *et al.*, 2009) for further information about this methodology). Besides, the mesh opening angle varies during fishing according to the state of the mesh (stiff or slack), which affects the size selective potential of codend meshes (Herrmann *et al.*, 2016). Therefore, we carried out fall-through experiments for four different codend mesh scenarios. The codend was stretched to obtain different opening angles, which were  $\sim 35^\circ$ ,  $60^\circ$ , and  $90^\circ$  opening angle, as well as for a slack mesh (a slack mesh is flexible, and not in a stretched position). These, four mesh scenarios were assumed to represent the potential variation in the mesh openings encountered during fishing, and thus cover the size selective potential of the codend during buffer towing, including the potential effects of codend catch weight, position along the codend, and sea state (O'Neill and Herrmann, 2007). The purpose of these fall-through experiments was to provide approximate limits for the sizes of cod that potentially could be subjected to size selection in the codend during buffer towing. Knowing these limits will help the interpretation of the results being obtained from the experimental fishing.

The data obtained from the fall-through experiments for each mesh scenario was analysed separately as covered codend data, and a logit selection model (8) was fitted to the data using SELNET. We estimated  $L05$  and  $L95$ , which denote the lengths of cod with 5 and 95% likelihoods of being retained, respectively (i.e. not passing through the codend meshes) to represent the approximately size range for cod that potentially could be subjected to a size selection process during buffer towing. Therefore, among the four mesh scenario's tested, we selected the one with the highest  $L95$  value to represent the upper size limit, where only very few cod above that limit had the potential to escape during buffer towing. Likewise, we used the mesh scenario leading to the lowest  $L05$  value to represent the lower size limit for cod at which the codend meshes begin to restrict escapement of some cod.

Using the logit size selection model (8), we calculated the 5 and 95% probability of retention by setting  $(l, r(l))$  to  $(L05, 0.05)$  and  $(L95, 0.95)$ , respectively, and then solving the equations with respect to  $L05$  and  $L95$  (Krag *et al.*, 2015). The simple calculations yielded the following.

$$\begin{aligned} L05 &= L50 - SR \times \frac{\ln(19)}{\ln(9)} \\ L95 &= L50 + SR \times \frac{\ln(19)}{\ln(9)} \end{aligned} \quad (10)$$

## Results

### Data

We completed a total of 20 alternating hauls, where 10 were conducted as regular hauls, i.e. taking the catch directly onboard, and 10 as buffer hauls (Table 1). The area, towing time, towing depth, and buffer-towing depth were kept as constant as possible to reduce between-haul variation, and we also ensured that the samples were taken from the same population of fish (Figure 2, Table 1). Subsampling was not performed and the lengths of 7670 cod were



**Table 1.** Haul details showing haul no., towing start and towing time, haul type, sea state (according to Douglas sea scale), depth, average buffer-towing depth with the standard deviation in brackets, and the percentage depth reduction during buffer towing, as well as the number of cod caught in each haul with mean, minimum, and maximum size.

| Haul nr. | Time start (UTC) | Towing time (min) | Buffer towing | Sea state | Depth (m) | Mean buffer towing depth (m) | Depth reduction (%) | Number of cod | Mean size (cm) | Min. size (cm) | Max. Size (cm) |
|----------|------------------|-------------------|---------------|-----------|-----------|------------------------------|---------------------|---------------|----------------|----------------|----------------|
| 1        | 16:48            | 130               | No            | 4         | 365.5     | –                            | –                   | 380           | 74.3           | 41             | 108            |
| 2        | 00:53            | 196               | Yes           | 4         | 374.1     | 216.9 (4.0)                  | 42.0                | 641           | 77.1           | 48             | 110            |
| 3        | 04:54            | 108               | No            | 4         | 367.4     | –                            | –                   | 320           | 72.8           | 42             | 103            |
| 4        | 07:29            | 193               | Yes           | 4         | 372.8     | 208.9 (3.3)                  | 44.0                | 432           | 74.5           | 47             | 110            |
| 5        | 12:00            | 120               | No            | 4         | 362.7     | –                            | –                   | 307           | 73.7           | 47             | 110            |
| 6        | 15:00            | 145               | Yes           | 3         | 372.0     | 212.8 (4.0)                  | 42.8                | 406           | 73.5           | 48             | 107            |
| 7        | 20:46            | 114               | No            | 3         | 372.7     | –                            | –                   | 190           | 67.1           | 33             | 107            |
| 8        | 00:43            | 193               | Yes           | 3         | 360.4     | 225.2 (6.5)                  | 37.5                | 810           | 76.8           | 45             | 110            |
| 9        | 04:49            | 120               | No            | 3         | 368.3     | –                            | –                   | 473           | 75.4           | 39             | 112            |
| 10       | 12:53            | 192               | Yes           | 3         | 368.6     | 210.4 (5.4)                  | 42.9                | 410           | 76.4           | 46             | 112            |
| 11       | 17:00            | 90                | No            | 3         | 365.5     | –                            | –                   | 358           | 80.3           | 42             | 117            |
| 12       | 19:29            | 168               | Yes           | 3         | 361.7     | 209.2 (5.8)                  | 42.2                | 557           | 79.5           | 48             | 114            |
| 13       | 23:01            | 100               | No            | 3         | 359.3     | –                            | –                   | 391           | 73.6           | 43             | 120            |
| 14       | 01:26            | 175               | Yes           | 3         | 358.8     | 217.7 (4.4)                  | 39.3                | 451           | 74.9           | 48             | 116            |
| 15       | 08:12            | 133               | No            | 3         | 341.8     | –                            | –                   | 773           | 76.6           | 36             | 111            |
| 16       | 13:31            | 192               | Yes           | 3         | 335.1     | 195.1 (5.1)                  | 41.8                | 762           | 77.1           | 41             | 115            |
| 17       | 17:09            | 120               | No            | 3         | 347.9     | –                            | –                   | 336           | 75.5           | 38             | 115            |
| 18       | 20:06            | 195               | Yes           | 3         | 341.9     | 205.1 (5.9)                  | 40.0                | 223           | 74.5           | 44             | 110            |
| 19       | 00:00            | 120               | No            | 3         | 351.1     | –                            | –                   | 365           | 72.7           | 38             | 104            |
| 20       | 03:13            | 199               | Yes           | 3         | 354.3     | 192.0 (3.8)                  | 45.8                | 204           | 71.7           | 41             | 110            |

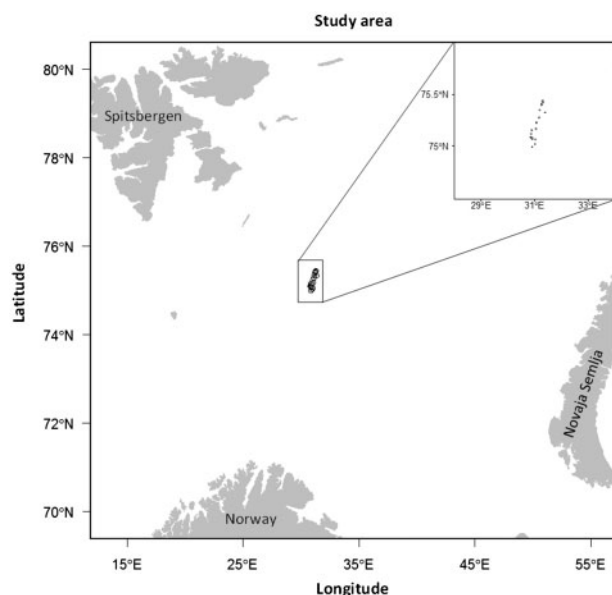

**Figure 2.** Map of the area where all hauls were conducted.

measured, including 4887 obtained from the hauls with buffer towing.

### Fall-through experiments

Fall-through experiments were conducted with 82 cod, which were sampled randomly from the codend in the size range between 34 and 72 cm. The fish were tested on slack meshes and through three different mesh openings; 35°, 60°, and 90°. The codend employed was the same as that used in the fishing trials. The fall-through size selectivity curves (Figure 3) and the values

of  $L_{05}$  and  $L_{95}$  (Table 2) indicated that the codend could release cod in the size range encountered during the cruise.

### Model selection

The length distributions for cod caught during the regular hauls with direct haul-back and the extended hauls with buffer towing are presented in Figure 4a. The null hypothesis model ( $H_0$ ) had a  $p$ -value well below 0.05 (Table 3), so it was highly unlikely that this model was valid, thereby implying that size selection occurred during buffer towing. Figure 4b shows the fit of the  $H_0$  model to the data, which indicates a clear length-dependent pattern in the differences between the model and data. Contrary, both the Logit and Clogit models for the buffer-towing selection result in  $p$ -values that make it highly likely that the discrepancy between observed data and fitted model is a coincidence (Table 3).

The experimental catch comparison rates presented in Figure 4b clearly differ from the black line representing  $H_0$ , thereby confirming that the null hypothesis should be rejected. Comparing the catch comparison curve in Figure 4b with 4c, visualizes this difference even more, while the latter catch comparison curve nicely follows the experimental data points, the catch comparison curve for the  $H_0$  model clearly deviates. Since the  $H_0$  model is a length independent catch comparison rate, the value of 0.64 is equal to that of the SP. The two models (8) and (9) both obtained catch comparison curves that agreed well with the trends in the experimental data, without any length-dependent patterns in the differences (Figure 4c).

In fact, both models obtained identical curves but the AIC value was higher for the Clogit model (Table 3). Thus, we selected the logit model to describe the size selectivity during buffer towing. According to the AIC values,  $H_0$  could be rejected because the AIC value was higher than that for the logit and the Clogit model. Using the method described by Herrmann *et al.* (2016),

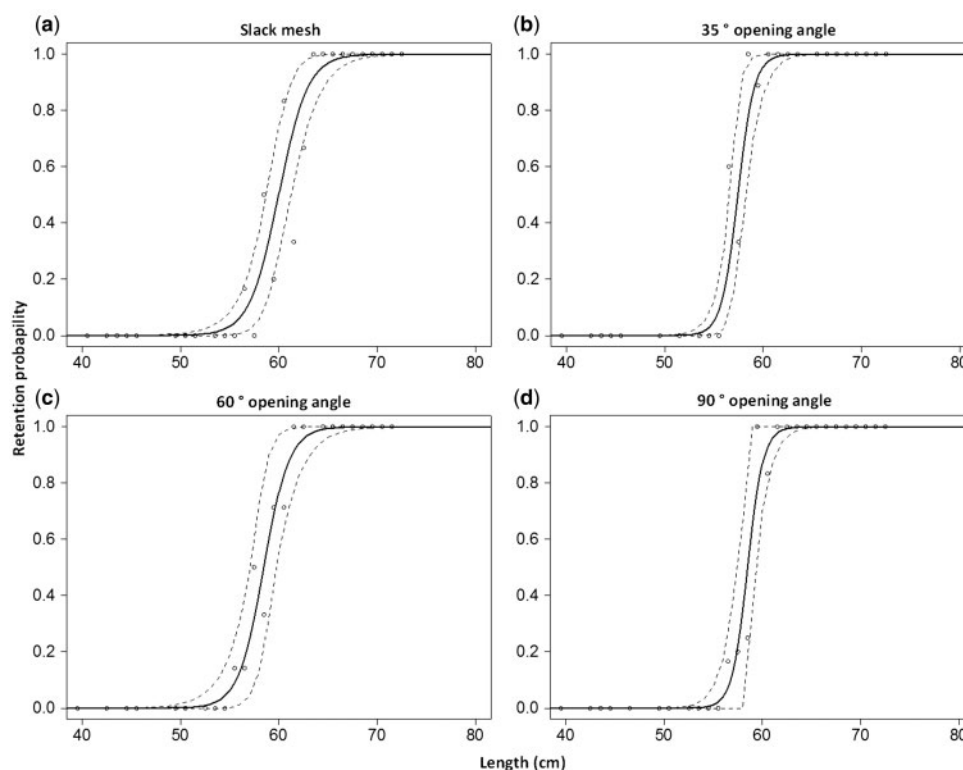

**Figure 3.** Fall-through selectivity curves with slack meshes (a), 35° opening angle (b), 60° opening angle (c), and 90° opening angle (d).

**Table 2.** L05 and L95 with 95% CIs in brackets according to the fall-through experiments for the slack mesh and three different mesh opening angles.

| Mesh opening | L05 cm (95% CI)     | L95 cm (95% CI)     |
|--------------|---------------------|---------------------|
| Slack        | 55.64 (53.82–57.77) | 64.33 (61.89–66.43) |
| 35°          | 55.96 (54.13–56.22) | 59.92 (58.17–61.19) |
| 60°          | 54.68 (52.34–57.49) | 62.27 (59.55–64.14) |
| 90°          | 56.17 (54.56–58.86) | 60.85 (58.68–62.07) |

**Table 3.** Model fit statistics (*p*-value, deviance, degrees of freedom (DOF), and AIC) for the H0, logit, and Clogit models.

| Model  | <i>p</i> -value | Deviance | DOF | AIC      |
|--------|-----------------|----------|-----|----------|
| H0     | 0.0034          | 118.35   | 79  | 10052.28 |
| Logit  | 0.5352          | 75.31    | 77  | 10013.24 |
| Clogit | 0.5008          | 75.31    | 76  | 10015.24 |

the relative likelihood between H0 and the logit model indicated that there was an  $8.96 \times 10^{-7}$  probability of H0 being extremely unlikely.

### Escape rate during buffer towing

The vertical line on the right-hand side in Figure 5 represents the upper limit (L95) for potential escapes by cod, which shows that minimal mesh size selection occurred to the right-hand side of this vertical line (95% retention rate). The results from the fall through experiments proved that this upper limit (L95) for potential escapes was achieved with slack meshes (Table 2).

However, the vertical line on the left-hand side represents the lower limit (L05), which shows that most cod below this limit had the potential to escape (5% retention rate) (Figure 5). For the lower limit (L05), the results from the fall through experiments proved that meshes with a 60° opening angle had the lowest retention probability (Table 2). Table 4 shows the parameters and estimated retention probabilities for specific sizes of cod, which proves that selection occurred for cod measuring up to at least 40–42 cm (Figure 5, Table 4). We cannot prove any size selection above 42 cm since the upper CI is equal to 1; however, the size selection curve indicates a selection process also for cod above 42 cm (Figure 5).

The size selection curve demonstrates that a large proportion of the undersized cod measuring up to at least 40 cm that were located in the codend when buffer towing was initiated will escape during buffer towing.

The most conservative estimate, i.e. the upper CI for the retention rate represented by the size selection curve (i.e. lower CI when considering the escape rate), proves a strongly length-dependent buffer towing escape rate (Figure 5). In particular, the upper CI of the retention curve proves an escape rate of 64% for cod measuring 20 cm, which declined to 46% for cod measuring 40 cm (Figure 5, Table 4). Thus, the number of escapes may have been high in terms of the number of fish, depending on the amount of cod in this size range that remained in the codend before buffer towing was initiated. The size selection curve provides evidence for the escape of cod up to at least 42 cm (Figure 5).

### Discussion

From a fishing industry perspective, buffer towing is controversial because it might reduce the quality and the value of the catch.

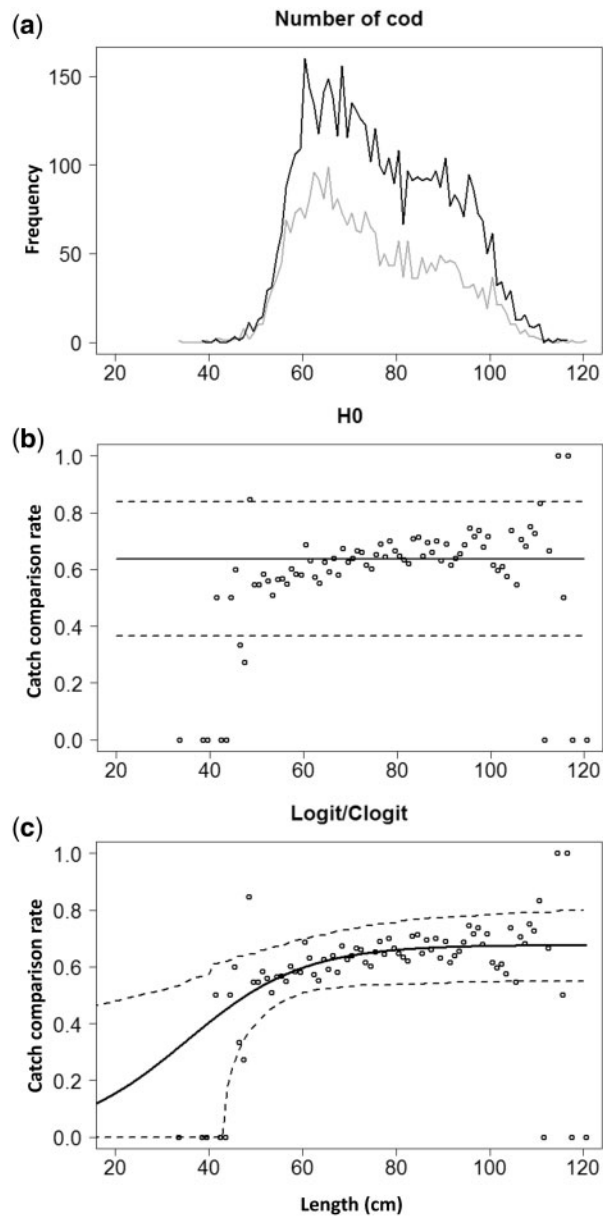

**Figure 4.** (a) Size distribution for cod caught in this study. The black line represents the catches with buffer towing and the grey line shows the hauls where the catch was taken directly onboard. (b)  $H_0$  model (black line) with 95 % confidence limits (stippled lines), and the experimental catch comparison rates (dots). (c) The modeled catch comparison rate (black solid curve) with 95% confidence limits (stippled curves) and the experimental data.

From a management viewpoint, buffer towing is considered to contribute to unaccounted mortality, with the consequences this entails for stock recruitment and stock health, as well as the productivity of the fishery. This study showed that considerable numbers of cod measuring at least 42 cm may escape during buffer towing. Due to wide  $CI$ 's we cannot prove escapement for cod above this size, however, the size selectivity curve shows that it is highly likely that cod above 42 cm escape during buffer towing. This is further supported by the results from the fall-through experiments showing potential codend size selection for cod up to

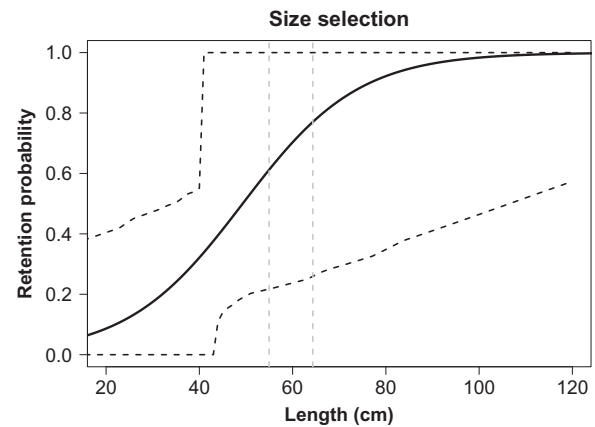

**Figure 5.** Size selection curve (black solid curve) with 95% confidence limits (stippled curves). The grey stippled vertical lines represent  $L_{95}$  for the slack meshes (right) and  $L_{05}$  for the meshes with 60° opening angle (left), which indicate the 95% and 5% probability of retention, respectively.

**Table 4.** Escape probability for cod with 95%  $CI$ s from the hauls that were buffer towed.

| Length (cm)       | Escape probability | CI 95%, lower | CI 95%, upper |
|-------------------|--------------------|---------------|---------------|
| 20.0              | 0.91               | 0.60          | 1.00          |
| 25.0              | 0.88               | 0.56          | 1.00          |
| 30.0              | 0.83               | 0.53          | 1.00          |
| 35.0              | 0.76               | 0.50          | 1.00          |
| 40.0              | 0.68               | 0.45          | 1.00          |
| 44.0 <sup>a</sup> | 0.59               | 0.00          | 0.91          |
| 50.0              | 0.49               | 0.00          | 0.81          |
| 55.0              | 0.39               | 0.00          | 0.78          |
| 60.0              | 0.30               | 0.00          | 0.76          |
| 65.0              | 0.22               | 0.00          | 0.73          |
| 70.0              | 0.16               | 0.00          | 0.71          |
| 75.0              | 0.11               | 0.00          | 0.68          |
| 80.0              | 0.08               | 0.00          | 0.65          |

<sup>a</sup>44 = minimum landing size for cod.

at least 54 cm (lowest  $L_{05}$ ) and at most up to 64 cm (highest  $L_{95}$ ). Therefore, the number of escaping cod can be high, depending on the amount of cod in the selective size range that remain in the codend before buffer towing is initiated. Furthermore, the most conservative selectivity estimate, i.e. the upper  $CI$  limits for the retention rate (Table 4), proves a length-dependent escape rate during buffer towing of at least 64% for cod measuring 20 cm, which declines to at least 46% for cod measuring 40 cm. Thus, our findings support the claims of the Norwegian coast guard and management authorities who claimed that catches from vessels that have buffer towed contained fewer undersized fish compared with catches taken directly onboard. In addition, our results indicated that buffer towing can lead to losses of cod above the minimum landing size of 44 cm, and thus losses of the valuable marketable catch for the fishing vessel. This is illustrated by an estimated escape probability at 59% for cod at the minimum landing size (Table 4); however, we can only prove escape of cod to 42 cm, due to wide  $CI$ 's.

The experimental design employed in this study was challenging because few sampling designs could have been used to address

the research questions. However, the use of these traditional direct methods such as a cover codend setup or a multi-sampler may have led to biased estimates and results due to the possibility of fish re-entering the codend, as well as the cover affecting the behaviour of the codend. Therefore, we developed a novel indirect method to assess the selection during buffer towing as the research questions address. In contrast to traditional direct methods, i.e. measuring the absolute quantity of escaping fish, our method can calculate the rate of cod escaping during buffer towing, and thus it may be applied to other scenarios for the same species population. This method can also be applied for any other species requiring relative comparison of catch rates. However, a disadvantage of this indirect method is that it requires robust data, which can be obtained by increasing the number of hauls in order to achieve narrow *CI*s. An advantage of this method is that it allows buffer towing to be investigated without making changes to the trawl. Hence, the application of this method is especially advantageous for this type of research on commercial fishing vessels, where the possibility of modifying the trawl is often limited or impossible. Further, by avoiding covers or any other changes of trawl gear between the hauls, this method can potentially increase the sampling efficiency, as no time is lost for making gear changes or handling covers. In addition to avoiding the problem of biased estimates and changes in the trawls, it could easily be applied to investigate similar issues, such as investigating other typical bycatch species in the same fishery, including haddock (*Melanogrammus aeglefinus*), saithe (*Pollachius virens*), or redfish (*Sebastes* spp.), as well as in other similar fisheries where buffer towing is applied such as the Alaska trawl fisheries (Dietrich and Melvin, 2007).

Fish escapes during buffer towing have two main impacts. One impact is caused by the escape of legal sized cod which leads to less efficient harvesting, due to loss of marketable catch, and thus reduced catch per unit effort. However, this study could not prove whether there was any selection above the minimum landing size for cod because of the broad *CI* obtained. However, the results of the fall-through experiments determined the limits for size selection in the four different mesh scenarios with the codend employed, which showed that it is highly likely that size selection also occurred for fish above the minimum landing size during buffer towing. In addition, it is highly probable that the *CI*s would become narrower by increasing the number of hauls, thereby demonstrating the statistically significant size selectivity for fish above the minimum landing size. The second impact of fish escapes during buffer towing is the escape of fish below the minimum landing size, which this study proved. The escapement of fish below the minimum landing size is usually regarded as a positive improvement in the overall size selectivity, but its effect depends on the fate of the escapees. Thus, buffer towing would reduce the unintended mortality if the escaping fish survive, whereas it would contribute to increased unintended and unaccounted mortality if the escaping fish do not survive.

In general, fish caught by trawling are likely to sustain barotrauma-related injuries, exhaustion, stress, and behavioural impairment during trawling at the seabed as well as during the haul-back procedure (DeAlteris and Reifsteck, 1993; Soldal et al., 1993; Chopin and Arimoto, 1995; Suuronen et al., 1996, 2005; Midling et al., 2012; Rankin et al., 2017). Several studies have documented the high survival rate of cod escaping demersal trawls at the seabed (Soldal et al., 1993; Suuronen et al., 1996; Ingólfsson et al., 2007), but no studies have investigated the

survival of cod escaping during haul-back, during buffer towing, or at the surface (Madsen et al., 2008). Cod possess a physoclist swim bladder, so a rapid ascent can result in a rapid increase in positive buoyancy, and possible over inflation and bursting of the swim bladder. Since a deflated swim bladder is sealed immediately after bursting, and the pre-rupture strength is regained within 4 days, Midling et al. (2012) and Humborstad and Mangor-Jensen (2013) argue that such an injury in itself is considered to be relatively benign with a rapid recuperation time. However, the natural behaviour of cod with a ruptured swim bladder is to dive toward the seabed, which entails negative buoyancy, and this is likely to affect the rate of mortality due to behavioural impairment increasing the risk of predation (Nichol and Chilton, 2006; Midling et al., 2012). If the reduction in depth is small, the fish may partly decompress during buffer towing before escaping. However, if the swim bladder is initially underinflated, due to vertical diurnal migration, the rate of overinflation will be too small to make the swim bladder burst, preventing the fish from returning to its original depth and enhance the probability of “floaters” (i.e. fish usually found floating upside down on the surface) with a lethal outcome (Midling et al., 2012). Therefore, the depth at which trawlers buffer tow will probably affect the survival rate of any fish escaping during the process. In general, fish sustain various types of injuries during the catching or escape process, such as stress, behavioural impairment, scale damage with possible subsequent osmotic disturbances or infections, barotrauma-related injuries, or other types of injuries. These factors are known to cause long-term delayed mortality due to the elevated risk of predation and susceptibility to disease (Chopin and Arimoto, 1995; Davis, 2002; Ryer, 2002, 2004; Ryer et al., 2004). It is likely that buffer towing increases the risk of the above mentioned injuries and it is therefore highly probable that buffer towing contributes to unaccounted fishing mortality.

In this study, we demonstrated the occurrence of a significant size selection process during buffer towing, which differs from normal tow procedures. Therefore, we suggest that the survivability of any fish escaping during these capture processes as well as in haul-back and at the surface should be investigated further.

## Acknowledgements

This study was part of the Centre of Research-based Innovation in Sustainable fish capture and Processing technology (CRISP) project funded by the Norwegian Research Council, Grant No. 203477. We are grateful for the effort and the highly appreciated comments from the editor and the two anonymous reviewers. We thank The Arctic University of Norway for financial support and the Norwegian Directorate of Fisheries for the necessary permits. We also thank Jure Brčić for help provided during the cruise.

## References

- Akaike, H. 1974. A new look at the statistical model identification. *IEEE Transactions on Automatic Control*, 19: 716–722.
- Chopin, F. S., and Arimoto, T. 1995. The condition of fish escaping from fishing gears—a review. *Fisheries Research*, 21: 315–327.
- Davis, M. W. 2002. Key principles for understanding fish bycatch discard mortality. *Canadian Journal of Fisheries and Aquatic Sciences*, 59: 1834–1843.
- DeAlteris, J. T., and Reifsteck, D. M. 1993. Escapement and survival of fish from the codend of a demersal trawl. *ICES Marine Sciences Symposium*, 196: 128–131.



- Dietrich, K. S., and Melvin, E. F. 2007. Alaska Trawl Fisheries: Potential Interactions with North Pacific Albatrosses. WSG-TR 07-01, Washington Sea Grant, Seattle, WA.
- Grimaldo, E., Larsen, R. B., Sistiaga, M., Madsen, N., and Breen, M. 2009. Selectivity and escape percentages during three phases of the towing process for codends fitted with different selection systems. *Fisheries Research*, 95: 198–205.
- Grimaldo, E., Sistiaga, M., and Larsen, R. B. 2014. Development of catch control devices in the Barents Sea cod fishery. *Fisheries Research*, 155: 122–126.
- Herrmann, B., Krag, L., Frandsen, R., Madsen, N., Lundgren, B., and Stæhr, K. J. 2009. Prediction of selectivity from morphological conditions: Methodology and case study on cod (*Gadus morhua*). *Fisheries Research*, 97: 59–71.
- Herrmann, B., Mieske, B., Stepputtis, D., Krag, L. A., Madsen, N., and Noack, T. 2013. Modelling towing and haul-back escape patterns during the fishing process: a case study for cod, plaice, and flounder in the demersal Baltic Sea cod fishery. *ICES Journal of Marine Science*, 70: 850–863.
- Herrmann, B., Larsen, R. B., Sistiaga, M., Madsen, N. H. A., Aarsæther, K. G., Grimaldo, E., and Ingolfsson, O. A. 2016. Predicting Size Selection of Cod (*Gadus morhua*) in Square Mesh Codends for Demersal Seining: a Simulation-based Approach. *Fisheries Research*, 184: 36–46.
- Herrmann, B., Sistiaga, M., Rindahl, L., and Tatone, I. 2017. Estimation of the effect of gear design changes on catch efficiency: Methodology and a case study for a Spanish longline fishery targeting hake (*Merluccius merluccius*). *Fisheries Research*, 185: 153–160.
- Humborstad, O.-D., and Mangor-Jensen, A. 2013. Buoyancy adjustment after swimbladder puncture in cod *Gadus morhua*: An experimental study on the effect of rapid decompression in capture-based aquaculture. *Marine Biology Research*, 9: 383–393.
- ICES. 2015. Report of the Arctic Fisheries Working Group (AFWG), 2015. Hamburg, Germany. ICES CM 2015/ACOM: 05, 639 pp.
- ICES. 2016. Cod (*Gadus morhua*) in subareas 1 and 2 (Northeast Arctic). ICES Advice on fishing opportunities, catch, and effort Barents Sea and Norwegian Sea Ecoregion, June 2016. <http://www.ices.dk/sites/pub/Publication%20Reports/Advice/2016/2016/cod-arct.pdf>
- Ingolfsson, Ö. A., Soldal, A. V., Huse, I., and Breen, M. 2007. Escape mortality of cod, saithe, and haddock in a Barents Sea trawl fishery. *ICES Journal of Marine Science*, 64: 1836–1844.
- Isaksen, B., and Løkkeborg, S. 1993. Escape of cod (*Gadus morhua*) and haddock (*Melanogrammus aeglefinus*) from Danish seine codends during fishing and surface hauling operations. ICES Marine Science Symposium, 196: 86–91.
- Madsen, N., and Holst, R. 2002. Assessment of the cover effect in trawl codend selectivity experiments. *Fisheries Research*, 56: 289–301.
- Madsen, N., Skeide, R., Breen, M., Krag, L. A., Huse, I., and Soldal, A. V. 2008. Selectivity in a trawl codend during haul-back operation – an overlooked phenomenon. *Fisheries Research*, 91: 168–174.
- Midling, K. Ø., Koren, C., Humborstad, O.-D., and Sæther, B.-S. 2012. Swimbladder healing in Atlantic cod (*Gadus morhua*), after decompression and rupture in capture-based aquaculture. *Marine Biology Research*, 8: 373–379.
- Nichol, D. G., and Chilton, E. A. 2006. Recuperation and behaviour of Pacific cod after barotrauma. *ICES Journal of Marine Science*, 63: 83–94.
- Norwegian Directorate of Fisheries. 2013. Teknisk arbeidsgruppe om fangstregulerende tiltak i trålfisket. Rapport fra en arbeidsgruppe med medlemmer fra næring, forskning, forvaltning og kystvakt. In Norwegian.
- O'Neill, F. G., and Herrmann, B. 2007. PRESEMO- a predictive model of codend selectivity- a tool for fisheries managers. *ICES Journal of Marine Science*, 64: 1558–1568.
- R Core Team, 2013. R: A language and environment for statistical computing. R Foundation for Statistical Computing, Vienna, Austria. <http://www.R-project.org/>
- Rankin, P. S., Hannah, R. W., Blume, M. T., Miller-Morgan, T. J., and Heidel, J. R. 2017. Delayed effects of capture-induced barotrauma on physical condition and behavioral competency of recompressed yelloweye rockfish, *Sebastes ruberrimus*. *Fisheries Research*, 186: 258–268.
- Ryer, C. H. 2002. Trawl stress and escapee vulnerability to predation in juvenile walleye pollock: Is there an unobserved bycatch of behaviorally impaired escapees? *Marine Ecology Progress Series*, 232: 269–279.
- Ryer, C. H. 2004. Laboratory evidence for behavioural impairment of fish escaping trawls: a review. *ICES Journal of Marine Science*, 61: 1157–1164.
- Ryer, C. H., Ottmar, M. L., and Sturm, E. A. 2004. Behavioral impairment after escape from trawl codends may not be limited to fragile fish species. *Fisheries Research*, 66: 261–269.
- Santos, J., Herrmann, B., Mieske, B., Stepputtis, D., Krumme, U., and Nilsson, H. 2016. Reducing flatfish bycatch in roundfish fisheries. *Fisheries Research*, 184: 64–73.
- Sistiaga, M., Herrmann, B., Grimaldo, E., and O'Neill, F. G. 2016. Estimating the selectivity of unpaired trawl data: a case study with a pelagic gear. *Science Marine*, 80: 321–327.
- Soldal, A. V., Engås, A., and Isaksen, B. 1993. Survival of gadoids that escape from a demersal trawl. ICES Marine Science Symposium, 196: 122–127.
- Soldal, A. V., Isaksen, B., Marteinson, J. E., and Engås, A. 1991. Scale damage and survival of cod and haddock escaping from a demersal trawl. ICES Fish Capture Committee C.M. 1991/B: 44.
- Suuronen, P., Lehtonen, E., and Jounela, P. 2005. Escape mortality of trawl caught Baltic cod (*Gadus morhua*) - the effect of water temperature, fish size and codend catch. *Fisheries Research*, 71: 151–163.
- Suuronen, P., Lehtonen, E., Tschernij, V., and Larsson, P. Q. 1996. Skin injury and mortality of Baltic cod escaping from trawl codends equipped with exit windows. ICES CM 1995/B: 8 Fish Capture Committee.
- Wileman, D. A., Ferro, R. S.T., Fonteyne, R., Millar, R. B. (Eds.) 1996. Manual of Methods of Measuring the Selectivity of Towed Fishing Gears. ICES Cooperative Research Report No. 215. 126 pp.
- Yaragina, N. A., Aglen, A., and Sokolov, K. M. 2011. 5.4 Cod. In: The Barents Sea: Ecosystem, Resources, Management: Half a Century of Russian-Norwegian Cooperation, pp. 225–270. Ed. by T. Jakobsen and V. K. Özigin Tapir Academic Press, Trondheim.

Handling editor: Stephen Eayrs
